# Supplementary material for: Chlorine-doped α-Co(OH)2 hollow nano-dodecahedrons prepared by a ZIF-67 self-sacrificing template route and enhanced OER catalytic activity
Source: Royal Society of Chemistry journal article supplement (doi:10.1039/c9dt02141h), 2019-01-01
Supplement: c9dt02141h1.pdf [file c9dt02141h1.pdf]

## Chlorine-doped $\alpha$ -Co(OH)<sub>2</sub> hollow nanododecahedrons prepared by a ZIF-67 self-sacrificing template route and enhanced OER catalytic activity

Qingqing Zha, Wenyan Xu, Xiaolei Li and Yonghong Ni \*

College of Chemistry and Materials Science, Key Laboratory of Functional Molecular Solids, Ministry of Education, Anhui Laboratory of Molecule-Based Materials, Anhui Key Laboratory of Functional Molecular Solids, Anhui Normal University, 189 Jiuhua Southern Road, Wuhu, 241002, PR China. Fax: +86-553-3869303. E-mail: [niyh@mail.ahnu.edu.cn](mailto:niyh@mail.ahnu.edu.cn).

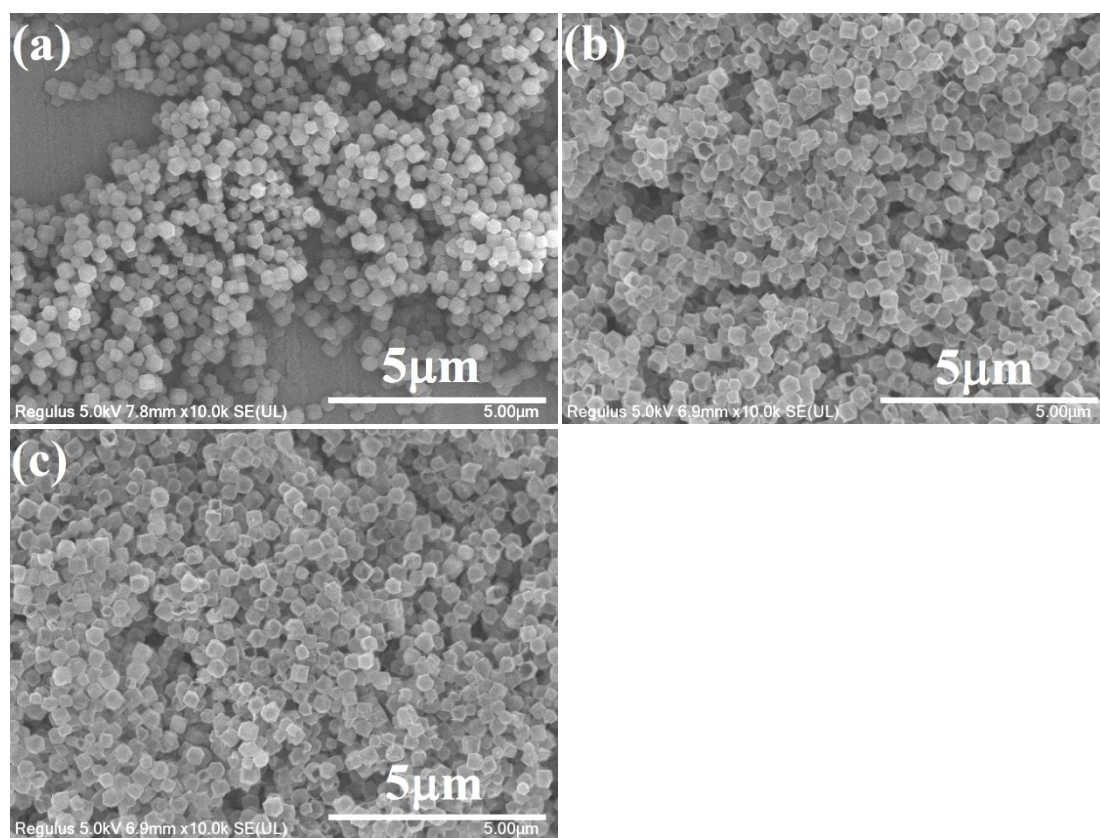

Fig.S1 Low-magnification FESEM images of ZIF-67 nanododecahedrons (a), the final products obtained in the absence (b) and presence (c) of NaCl at 40 °C for 4 h.

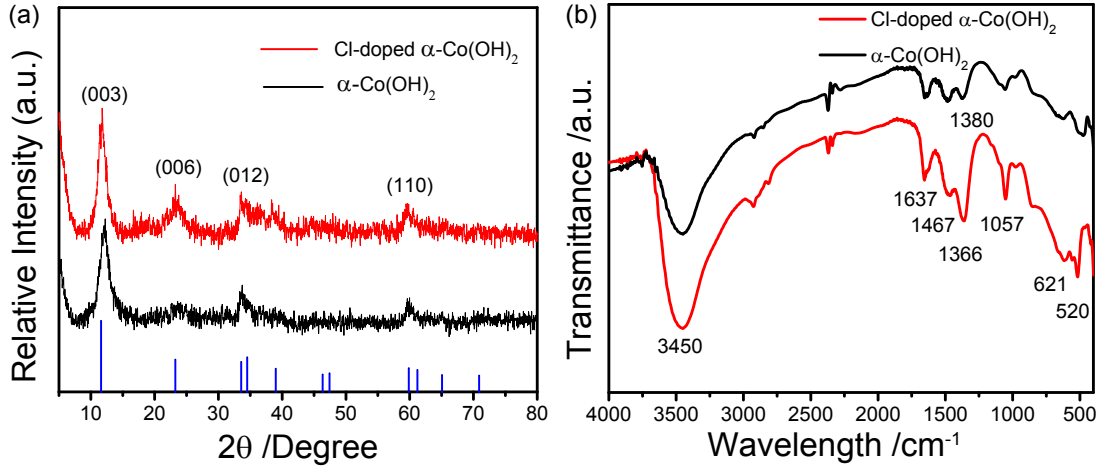

Fig.S2 (a) XRD patterns and (b) IR spectra of the as-prepared  $\alpha$ -Co(OH)<sub>2</sub> and Cl-doped  $\alpha$ -Co(OH)<sub>2</sub>.

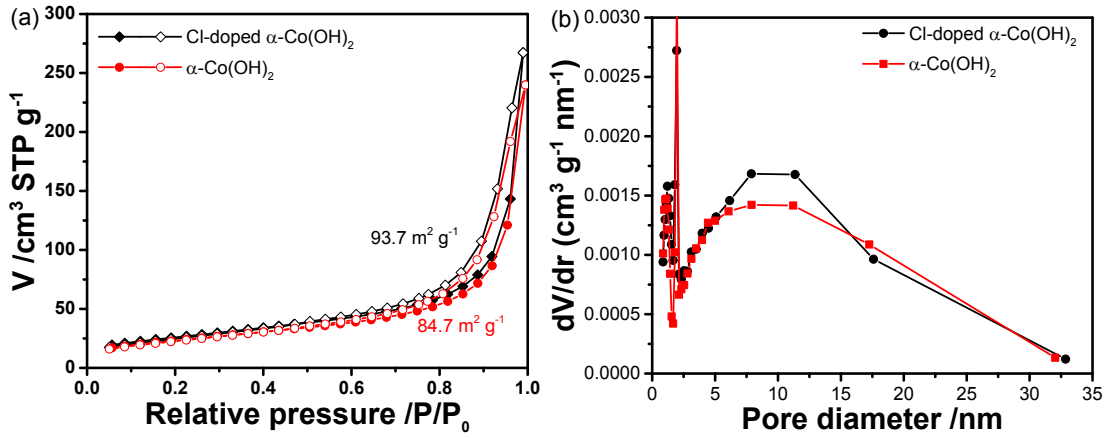

Fig.S3 (a) N<sub>2</sub> adsorption-desorption isotherms and (b) BJH pore size distributions of  $\alpha$ -Co(OH)<sub>2</sub> and Cl-doped  $\alpha$ -Co(OH)<sub>2</sub>.

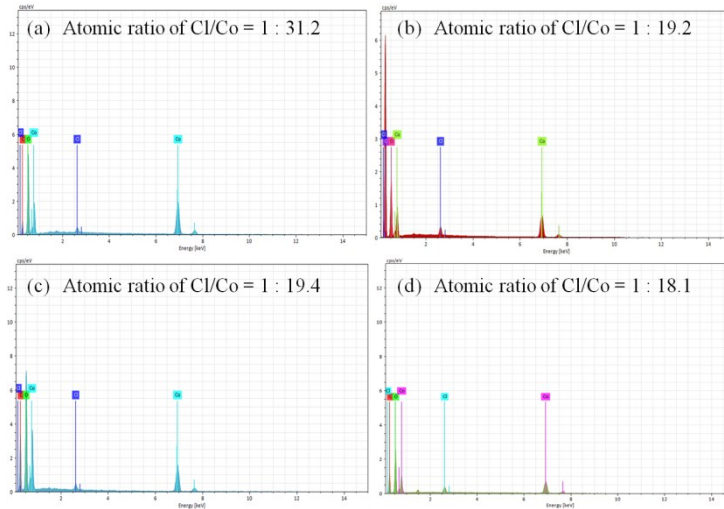

Fig.S4 EDS analyses of Cl-doped  $\alpha$ -Co(OH)<sub>2</sub> catalysts prepared from the systems with different amounts of NaCl under the same experimental conditions: (a) 30, (b) 50, (c) 100 and (d) 200 mg.

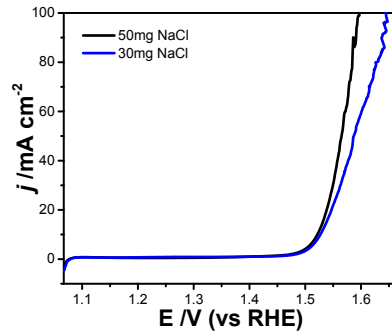

Fig.S5 LSV curves of the catalysts prepared from the systems with the NaCl amount of 30 and 50 mg, respectively.

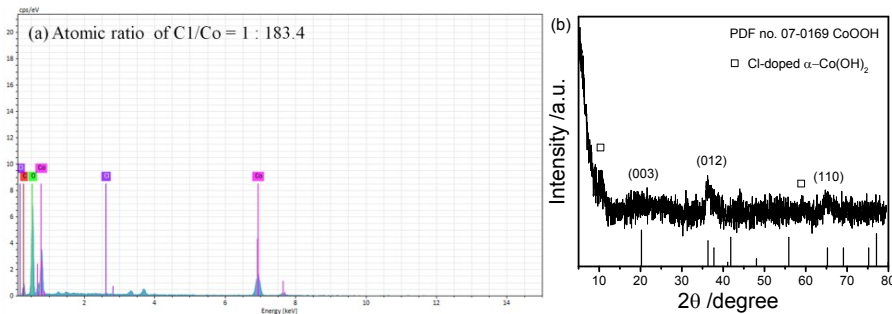

Fig.S6 (a) EDS analysis and (b) XRD pattern of Cl-doped  $\alpha$ -Co(OH)<sub>2</sub> catalyst after the first activation at the scan rate of 100 mV s<sup>-1</sup> in 1 M KOH solution.

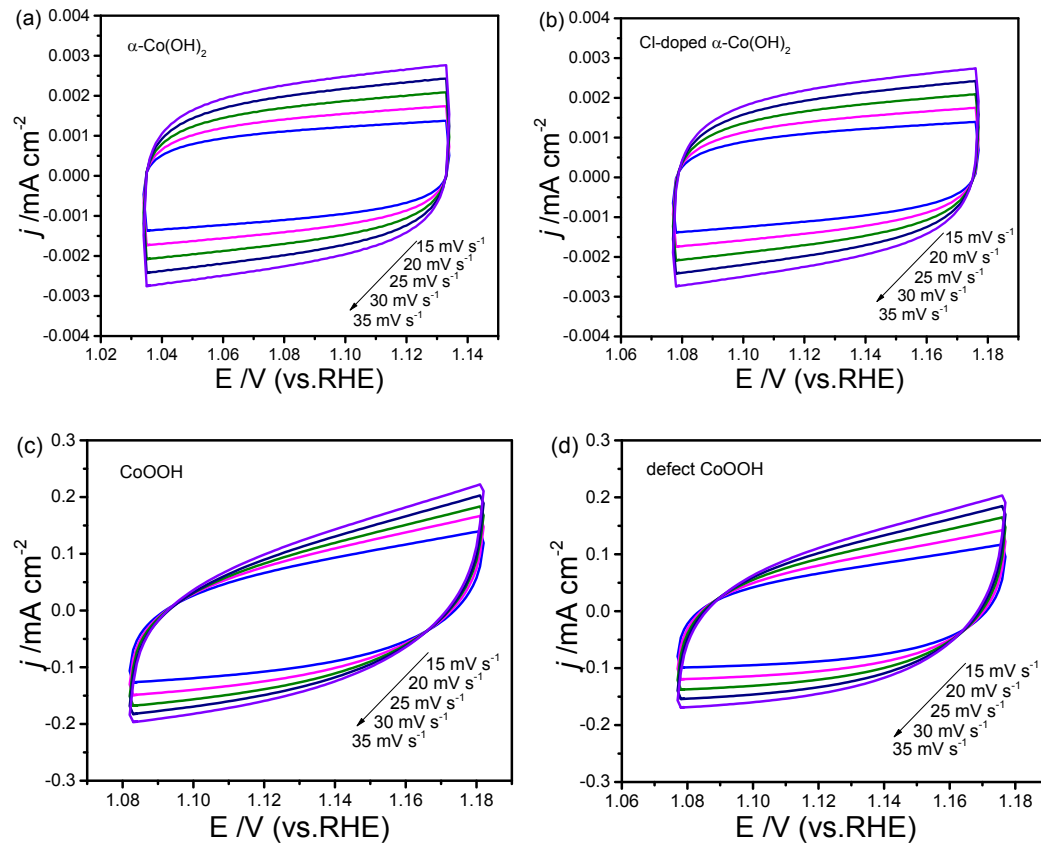

Fig.S7 CV curves of various electrodes in the potential window over a narrow range ( $\pm 50$  mV) centered on the open circuit potential (OCP) in CH<sub>3</sub>CN with 0.15 M KPF<sub>6</sub> at the scan rates of 15, 20, 25, 30 and 35 mV s<sup>-1</sup>, respectively: (a)  $\alpha$ -Co(OH)<sub>2</sub>/GCE, (b) Cl-doped  $\alpha$ -Co(OH)<sub>2</sub>/GCE, (c)

CoOOH/GCE and (d) defect CoOOH/GCE.

Table S1. The electrochemical double-layer capacitance ( $C_{dl}$ ) and electrochemical active surface area (ECSA) of as-prepared catalysts before and after continuously catalyzing for 40 h.

| Catalysts                              | $C_{dl}$ (mF cm <sup>-2</sup> ) | ECSA (= $C_{dl}/C_s$ ) |
|----------------------------------------|---------------------------------|------------------------|
| Cl-doped $\alpha$ -Co(OH) <sub>2</sub> | 0.062                           | 5.64                   |
| $\alpha$ -Co(OH) <sub>2</sub>          | 0.063                           | 5.73                   |
| defect CoOOH                           | 2.67                            | 242.7                  |
| CoOOH                                  | 2.25                            | 204.5                  |

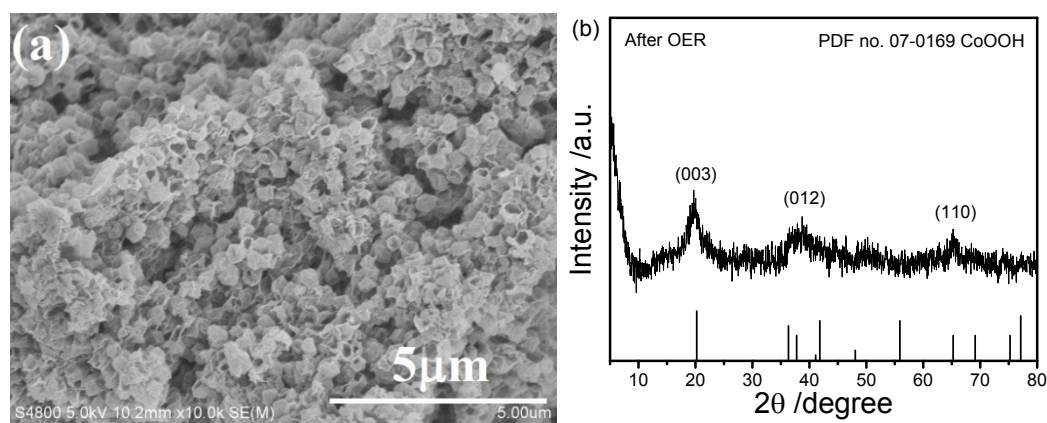

Fig.S8 FESEM image (a) and XRD pattern (b) of Cl-doped  $\alpha$ -Co(OH)<sub>2</sub> catalyst after continuously catalyzing 40 h in 1 M KOH solution at the current density of 10 mA cm<sup>-2</sup>.
